# Supplementary material
Source: Springer Nature journal article supplement (https://www.springermedizin.de/resource/supplementary/13011_2011_171_MOESM2_ESM.pdf/9628548)

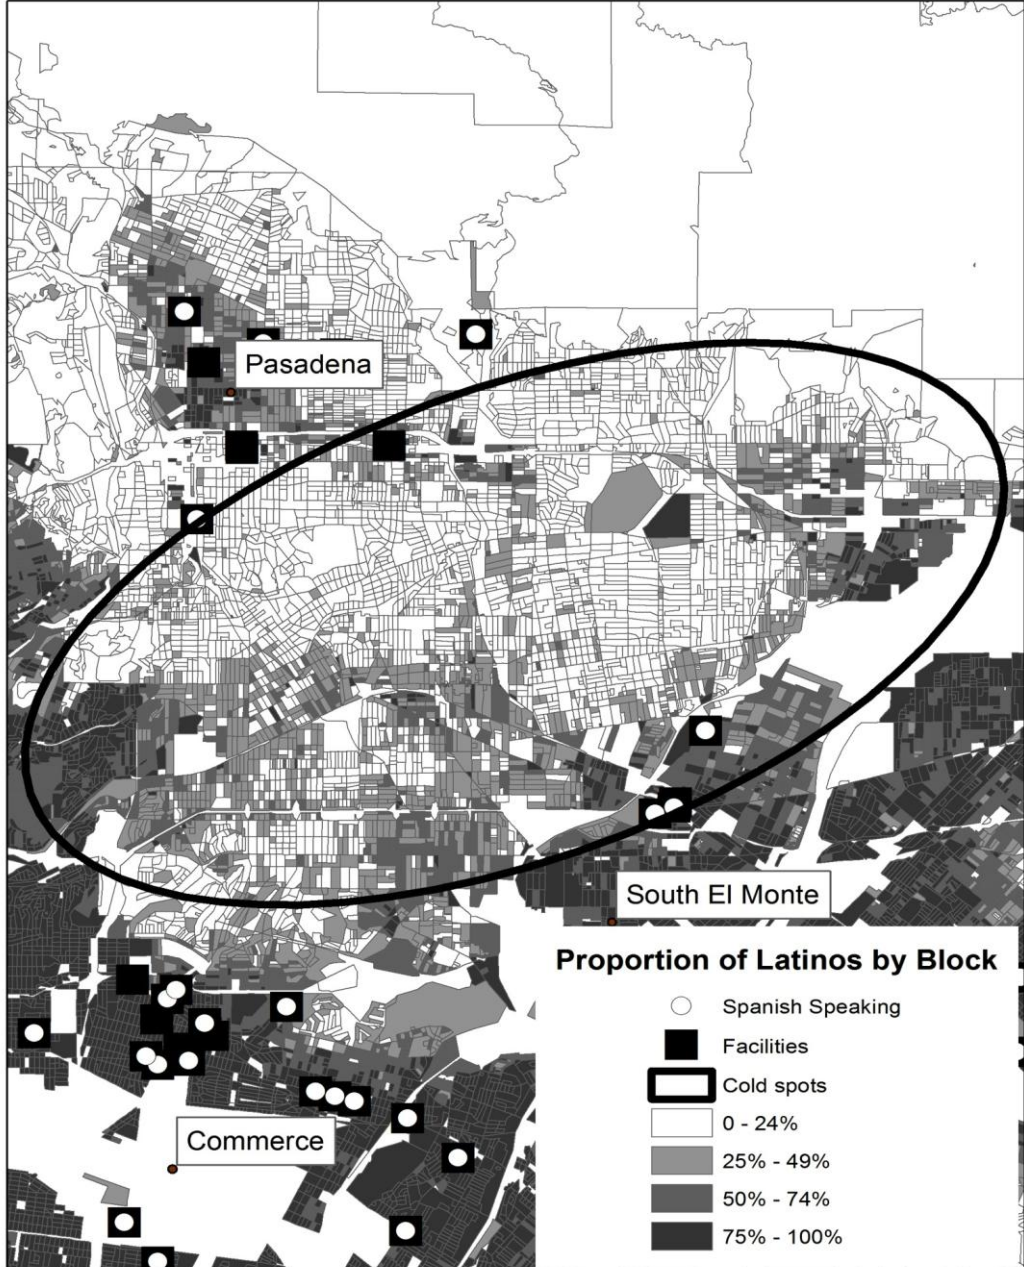

00.51 2 3 4  
 Kilometers

Supplement: MOESM2 [file 9628548]
